# Supplementary material for: Blood Parasites of Vangas and Other Corvoidea on Madagascar
Source: MDPI journal article supplement (doi:10.3390/d14100888), 2022-10-20
Supplement: s1 [file s1]

Supplementary Material “Blood Parasites of Vangas and Other Corvoidea on Madagascar”

**Table S1.** Haemosporidian detections in blood samples of Corvoidea species from Madagascar (n) using multiplex and nested PCR.

| bird species                        | n      | <i>Plasmodium</i> |            | <i>Haemoproteus</i> |            | <i>Leucocytozoon</i> |            |
|-------------------------------------|--------|-------------------|------------|---------------------|------------|----------------------|------------|
|                                     |        | multiplex PCR     | nested PCR | multiplex PCR       | nested PCR | multiplex PCR        | nested PCR |
| <b>Campechagidae</b>                |        |                   |            |                     |            |                      |            |
| <i>Coracina cinerea</i>             | 4      | 0                 | 0          | 0                   | 0          | 2                    | 3          |
| <b>Dicruridae</b>                   |        |                   |            |                     |            |                      |            |
| <i>Dicrurus forficatus</i>          | 8      | 0                 | 0          | 0                   | 0          | 0                    | 0          |
| <b>Monarchidae</b>                  |        |                   |            |                     |            |                      |            |
| <i>Terpsiphone mutata</i>           | 4<br>0 | 2                 | 2          | 0                   | 0          | 0                    | 3          |
| <b>Vangidae</b>                     |        |                   |            |                     |            |                      |            |
| <i>Calicalicus madagascariensis</i> | 1<br>2 | 3                 | 1          | 1                   | 0          | 4                    | 8          |
| <i>Cyanolanius madagascarinus</i>   | 4      | 1                 | 1          | 2                   | 1          | 1                    | 1          |
| <i>Hypositta corallirostris</i>     | 1      | 0                 | 0          | 0                   | 0          | 0                    | 1          |
| <i>Leptopterus chabert</i>          | 2      | 1                 | 0          | 2                   | 2          | 1                    | 2          |
| <i>Mystacornis crossleyi</i>        | 6      | 0                 | 0          | 0                   | 1          | 0                    | 0          |
| <i>Newtonia amphichroa</i>          | 2<br>6 | 11                | 13         | 10                  | 7          | 3                    | 2          |
| <i>Newtonia brunneicauda</i>        | 1<br>2 | 5                 | 1          | 11                  | 11         | 0                    | 7          |
| <i>Pseudobias wardi</i>             | 4      | 2                 | 1          | 3                   | 3          | 0                    | 2          |
| <i>Tylas eduardi</i>                | 9      | 6                 | 3          | 3                   | 3          | 3                    | 7          |
| <i>Vanga curvirostris</i>           | 2      | 1                 | 1          | 1                   | 1          | 1                    | 2          |
| <i>Xenopirostris polleni</i>        | 1      | 1                 | 0          | 1                   | 0          | 1                    | 1          |

**Table S2.** Newly described lineages/sequences in our study. Accession number, target gene fragment and names are given.

| Accession number | Gene         | Sequence name                                   | parasite taxa      |
|------------------|--------------|-------------------------------------------------|--------------------|
| OP006599         | Cytochrome b | TYLEDU02                                        | Haemosporida       |
| OP006600         | Cytochrome b | CALMAD03                                        | Haemosporida       |
| OP006601         | Cytochrome b | NEWBR06                                         | Haemosporida       |
| OP006602         | Cytochrome b | LEPCHA02                                        | Haemosporida       |
| OP006603         | Cytochrome b | NEWAM08                                         | Haemosporida       |
| OP006604         | Cytochrome b | XENPOL01                                        | Haemosporida       |
| OP006605         | Cytochrome b | CALMAD04                                        | Haemosporida       |
| OP006606         | Cytochrome b | CYAMAD02                                        | Haemosporida       |
| OP006607         | Cytochrome b | TYLEDU03                                        | Haemosporida       |
| OP006608         | Cytochrome b | TYLEDU04                                        | Haemosporida       |
| OP006609         | Cytochrome b | NEWBR07                                         | Haemosporida       |
| OP006610         | Cytochrome b | PSEWAR02                                        | Haemosporida       |
| OP006611         | Cytochrome b | PSEWAR03                                        | Haemosporida       |
| OP006612         | Cytochrome b | LEPCHA03                                        | Haemosporida       |
| OP006613         | Cytochrome b | TERMUT01                                        | Haemosporida       |
| OP006583         | 28S rRNA     | Onchocercidae sp. isolate DNAEW                 | microfilariae      |
| OP006584         | 28S rRNA     | <i>Splendidofilaria bartletti</i> isolate TYLAS | microfilariae      |
| OP006585         | 28S rRNA     | Onchocercidae sp. isolate CROSSBAB              | microfilariae      |
| OP006586         | 28S rRNA     | <i>Aproctella alessandroi</i> isolate PARFLY    | microfilariae      |
| OP006587         | Cox1         | Onchocercidae sp. isolate DNAEW                 | microfilariae      |
| OP006588         | Cox1         | <i>Splendidofilaria bartletti</i> isolate TYLAS | microfilariae      |
| OP006589         | Cox1         | Onchocercidae sp. isolate CROSSBAB              | microfilariae      |
| OP006590         | Cox1         | <i>Aproctella alessandroi</i> isolate PARFLY    | microfilariae      |
| OP006591         | Cox1         | Onchocercidae sp. isolate CROSSBAB2             | microfilariae      |
| OP006592         | 18S rRNA     | <i>Trypanosoma</i> sp. CORVOID02                | <i>Trypanosoma</i> |
| OP006593         | 18S rRNA     | <i>Trypanosoma</i> sp. CORVOID01                | <i>Trypanosoma</i> |
| OP006594         | 18S rRNA     | <i>Trypanosoma anguiformis</i> CORVOID03        | <i>Trypanosoma</i> |
| OP006595         | 18S rRNA     | <i>Trypanosoma avium</i> CORVOID3               | <i>Trypanosoma</i> |
| OP006596         | 18S rRNA     | <i>Trypanosoma avium</i> CORVOID1               | <i>Trypanosoma</i> |
| OP006597         | 18S rRNA     | <i>Trypanosoma avium</i> CORVOID2               | <i>Trypanosoma</i> |
| OP006598         | 18S rRNA     | <i>Trypanosoma avium</i> CORVOID4               | <i>Trypanosoma</i> |

**Table S3:** Genetic distances between *Haemoproteus* lineages isolated from *Newtonia brunneicauda* (Vangidae) on Madagascar based on a 462 bp fragment of Cytochrome b.

|         | NEWBR03 | NEWBR01 | NEWBR04 | NEWBR05 | NEWBR02 | NEWBR07 |
|---------|---------|---------|---------|---------|---------|---------|
| NEWBR03 |         | 31      | 31      | 30      | 29      | 29      |
| NEWBR01 | 31      |         | 0       | 1       | 9       | 11      |
| NEWBR04 | 31      | 0       |         | 1       | 9       | 11      |
| NEWBR05 | 30      | 1       | 1       |         | 8       | 10      |
| NEWBR02 | 29      | 9       | 9       | 8       |         | 2       |
| NEWBR07 | 29      | 11      | 11      | 10      | 2       |         |
